# Supplementary material for: NOD1 variation, immunoglobulin E and asthma
Source: Oxford University Press journal article supplement (doi:10.1093/hmg/ddi087), 2005-02-17
Supplement: ddi087_Supplementary_Data.zip [file ddi087_Supplementary_Data.zip]

**Supplementary Table 1.** Polymorphisms within NOD1/CARD4 genomic sequence and their genomic context:

|           |            |                                                                    |
|-----------|------------|--------------------------------------------------------------------|
| ND1-664   | rs2736726  | tatatgattgaatgtacttctcagtgatga[g/a]taagtgacaactttctgtagcatgatatcc  |
| ND1+233   | rs2075817  | tgcgagtgaggaggcgcagggaggcgggat[t/c]tgcgtgcgggcggaacgcagcgcggctctg  |
| ND1+18915 | rs2975632  | aggtcgggaaaggaggatgaaggaagctg[t/c]gcaacaccccttcccagcttctaaagaat    |
| ND1+21658 | rs3020207  | gaaaccccacaaccagtgggaggtggggtg[a/g]gctcttctgtagcttttgcttgctgatg    |
| ND1+21984 | rs2075818  | caacttgctgaagaatgactacttctcggc[g/c]gaagatcgggagattgtgtgcctgcccc    |
| ND1+25816 | rs2235099  | ggagctgctgctggaggagatctacatgga[c/t]accatcatggagctggttgcttcagcaat   |
| ND1+26129 | rs3020208  | aagcactactgctaccagagcgggacccc[g/a]aggaggtgttgccttctgctgcgcttcc     |
| ND1+27053 | rs2075821  | ttcagtgctgcagggcagtggtccggcg[t/c]gggaagaccttcaagaacaaggatcact      |
| ND1+27606 | rs2075822  | ggccaggctcggaggcatcggaatggca[t/c]catggaccaggatccccaggactcatgac     |
| ND1+32656 | rs6958571* | ggatgtatgtgtacaacctgctgtgtgtg[t-/gg]ggggggcgggccttgctgttctttcatac  |
| ND1+45343 | rs2907748  | gagggagggtgggctcctctacaggtagct[g/a]ggctaagaaataggagcccagggtacaggat |
| ND1+50150 | rs5743368  | gttttttaaacttgctttagaactgttt[g/a]gaactgtcataaaatcgatcagtttggtg     |

\* This is the SNP Database reference for a t/g single base pair substitution at the same position without the accompanying insertion/deletion

**Supplementary Table 2.** Oligonucleotide primers employed for the massExtend™ genotyping:

|           |            |                                |                                 |                          |
|-----------|------------|--------------------------------|---------------------------------|--------------------------|
| ND1-664   | rs2736726  | acgttggatgtactcacaagcatcagtggc | acgttggatggtccataagggatatcatgc  | attgaatgtacttcttcagtgtga |
| ND1+233   | rs2075817  | acgttggatgaccagagctcctccagag   | acgttggatgaggcccttctgaggtcctg   | cgttccgcccgcacgca        |
| ND1+18915 | rs2975632  | acgttggatgaagcagtgagtaaacgggc  | acgttggatgcttagaaagctgggaaggg   | ggagggatgaaggaagctg      |
| ND1+21658 | rs3020207  | acgttggatgcccctgaagagatcaatgac | acgttggatgtagagaaacccacaccag    | aaagcaaaagctacagaaagagc  |
| ND1+21984 | rs2075818  | acgttggatgcaggcacacacaatctccgc | acgttggatgccgaatactcagtgtctgg   | cacacaatctccgcatttc      |
| ND1+25816 | rs2235099  | acgttggatgtcattgctgaagccaaccag | acgttggatgaagttcgtgctgtgctatgc  | aagccaaccagctccatgatggt  |
| ND1+26129 | rs3020208  | acgttggatgaggccatgaaggtgaagag  | acgttggatgtgctcttcaagcactactgc  | cagcaggaaggcaaacacctcct  |
| ND1+27053 | rs2075821  | acgttggatgggaagaggttggtgaactgg | acgttggatgtatcctccttctcccggtc   | ttcttgaagaggtcttcccg     |
| ND1+27606 | rs2075822  | acgttggatgaaggggagcaacaggtggg  | acgttggatgaagggccatggtcatgagtc  | gagggcatcgggaatggca      |
| ND1+32656 | rs6958571* | acgttggatggtccttctggtgtactgatg | acgttggatggtatgtgtgtacaacctgctg | agcaaggcccgccccc         |
| ND1+45343 | rs2907748  | acgttggatgtacctgggctcctatttc   | acgttggatgaatctgagggtcagcaaag   | acctgggctcctatttcttagcc  |
| ND1+50150 | rs5743368  | acgttggatgccaactgatcgatttatg   | acgttggatgaacacaggctcctcatag    | ctgatcgatttatgacaagttc   |

\* This is the SNP Database reference for a t/g single base pair substitution at the same position without the accompanying insertion/deletion

**Supplementary Table 3A.** Primers used for ND1+32656 genotyping:

|          |                                |
|----------|--------------------------------|
| NODfwd   | ctgactgtcctcagggcttc           |
| NODrvs   | tccccaaaaggcaaatactg           |
| Arms_del | ggatgtatgtgtacaccctgctgtgtgtat |
| Arms_ins | Gaacagcaaggccccgccccctca       |

**Supplementary Table 3B.** Genotyping Conditions for ND1+32656

| 1 reaction Unit          |             |
|--------------------------|-------------|
| dNTPs                    | 0.5 µL      |
| KCl Buffer (Sigma)       | 0.5 µL      |
| Mg++ (25mM Sigma)        | 0.2 µL      |
| NODrvs (100 µM)          | 0.02 µL     |
| Arms_del (100 µM)        | 0.02 µL     |
| NODfwd (100 µM)          | 0.01625 µL  |
| Arms_ins (100 µM)        | 0.01625 µL  |
| H2O                      | 2.5525 µL   |
| Taq Gold (Sigma)         | 0.175 Units |
| DNA template (2,5 -10ug) | 1 µL        |
| Total Volume             | 5 µL        |

**Supplementary Table 3C.** Reaction Conditions:

|                                  |
|----------------------------------|
| 95°C for 15 min                  |
| 94°C for 1 min                   |
| 60°C for 1 min                   |
| 72 °C for 1 min                  |
| go to step 2 and repeat 30 times |
| 72°C for 10 min                  |
| End                              |

Run in a 3% agarose gel for about 35 minutes (visualize with ethidium bromide)

**Supplementary Table 4.** Oligonucleotide primer sequences used for mRNA amplification

| Fragment | Forward Primer             | Reverse Primer               |
|----------|----------------------------|------------------------------|
| 1        | gaagagcagggccacagtgagatg   | gagcagctcccactgagcagggt      |
| 2        | ctcttcaccttcgatggcctggac   | aggaagaggttggtgaactggaagtgat |
| 3        | atcacttcagttcaccaacctcttct | tcttcatagactttggcctcctctggtt |
